# Supplementary material for: Symptom Severity and Health-Related Quality of Life in Patients with Atrial Fibrillation: Findings from the Observational ARENA Study
Source: MDPI journal article supplement (doi:10.3390/jcm11041140), 2022-02-21
Supplement: s1 [file s1]

**Table S1.** Parameter estimates of a multiple regression model predicting EHRA scores concurrently from all significant predictors in the models reported in the main manuscript (compare Table 3 and Table 4).

|             | Predictor         | EHRA class 2a or 2b |                   |        |        |       | EHRA class 3 or 4 |                   |        |        |       |
|-------------|-------------------|---------------------|-------------------|--------|--------|-------|-------------------|-------------------|--------|--------|-------|
|             |                   | Coef.               | 95% CI            | z      | p      | OR    | Coef.             | 95% CI            | z      | p      | OR    |
| Confounders | (Intercept)       | 1.684               | 0.548;<br>2.821   | 2.904  | 0.004  | 5.390 | 0.735             | -0.732;<br>2.203  | 0.982  | 0.326  | 2.086 |
|             | Age               | -0.037              | -0.053;<br>-0.022 | -4.709 | <0.001 | 0.963 | -0.049            | -0.069;<br>-0.029 | -4.773 | <0.001 | 0.952 |
|             | Sex (female)      | 0.435               | 0.143;<br>0.726   | 2.921  | 0.003  | 1.544 | 1.245             | 0.869;<br>1.621   | 6.495  | <0.001 | 3.473 |
|             | AF Persistent     | 0.192               | -0.128;<br>0.512  | 1.175  | 0.240  | 1.211 | 0.380             | -0.042;<br>0.801  | 1.767  | 0.077  | 1.462 |
|             | AF Permanent      | -0.464              | -0.843;<br>-0.085 | -2.399 | 0.016  | 0.629 | -0.315            | -0.850;<br>0.220  | -1.155 | 0.248  | 0.730 |
| H2          | CAD               | 0.037               | -0.285;<br>0.359  | 0.223  | 0.823  | 1.037 | 0.517             | 0.068;<br>0.966   | 2.258  | 0.024  | 1.678 |
|             | Cardioversion     | 0.358               | 0.069;<br>0.647   | 2.428  | 0.015  | 1.431 | 0.273             | -0.113;<br>0.660  | 1.387  | 0.165  | 1.314 |
| H3          | Sleep disturbance | 0.230               | 0.067;<br>0.393   | 2.769  | 0.006  | 1.259 | 0.194             | -0.023;<br>0.412  | 1.753  | 0.080  | 1.215 |
|             | Stress Work       | 0.033               | -0.152;<br>0.218  | 0.353  | 0.724  | 1.034 | 0.276             | 0.046;<br>0.506   | 2.351  | 0.019  | 1.318 |
|             | Stress Financial  | -0.396              | -0.660;<br>-0.132 | -2.939 | 0.003  | 0.673 | -0.515            | -0.871;<br>-0.160 | -2.840 | 0.005  | 0.597 |
|             | Stress Noise      | 0.353               | 0.127;<br>0.579   | 3.066  | 0.002  | 1.424 | 0.170             | -0.134;<br>0.474  | 1.098  | 0.272  | 1.186 |
|             | CAQ-2             | 0.184               | 0.106;<br>0.263   | 4.594  | <0.001 | 1.202 | 0.194             | 0.090;<br>0.299   | 3.650  | <0.001 | 1.215 |

*Note.* AF = atrial fibrillation; CAD = Coronary artery disease; CAQ-2 = Cardiac Anxiety Questionnaire 2-item screener; H2 = Hypothesis 2; H3 = Hypothesis 3.

**Table S2.** Parameter estimates of a multiple regression model predicting EQ-5D-5L scores concurrently from all significant predictors in the models reported in the main manuscript (compare Table 5 and Table 6).

| Hypothesis  | Predictor         | Estimate | 95% CI            | $\beta$ | t-value | p      |
|-------------|-------------------|----------|-------------------|---------|---------|--------|
| Confounders | (Intercept)       | 1.310    | 1.225;<br>1.394   | 0.158   | 30.484  | <0.001 |
|             | Age               | -0.004   | -0.005;<br>-0.003 | -0.160  | -6.248  | <0.001 |
|             | Sex (female)      | -0.019   | -0.044;<br>0.006  | -0.077  | -1.496  | 0.135  |
|             | Persistent AF     | 0.006    | -0.022;<br>0.033  | 0.023   | 0.407   | 0.684  |
|             | Permanent AF      | -0.054   | -0.087;<br>-0.020 | -0.218  | -3.126  | 0.002  |
| H2          | CAD               | -0.024   | -0.053;<br>0.004  | -0.099  | -1.685  | 0.092  |
|             | DM                | -0.033   | -0.061;<br>-0.005 | -0.133  | -2.274  | 0.023  |
| H3          | Sleep disturbance | -0.031   | -0.045;<br>-0.017 | -0.111  | -4.249  | <0.001 |
|             | Stress Financial  | -0.052   | -0.076;<br>-0.029 | -0.116  | -4.341  | <0.001 |
|             | GAD-2             | -0.058   | -0.068;<br>-0.048 | -0.320  | -11.027 | <0.001 |
|             | CAQ-2             | -0.021   | -0.028;<br>-0.014 | -0.155  | -5.801  | <0.001 |

*Note.* AF = atrial fibrillation; CAD = Coronary artery disease; CAQ-2 = Cardiac Anxiety Questionnaire 2-item screener; DM = Diabetes mellitus; GAD-2 = Generalized Anxiety Disorder 2-item screener; H2 = Hypothesis 2; H3 = Hypothesis 3.
